# Supplementary material
Source: publisher site journal article supplement (https://kjim.org/upload/media/kjim-2022-311-Supplementary-Fig-5.pdf)
Supplement: Supplementary file 1 [file kjim-2022-311-Supplementary-Fig-5.pdf]

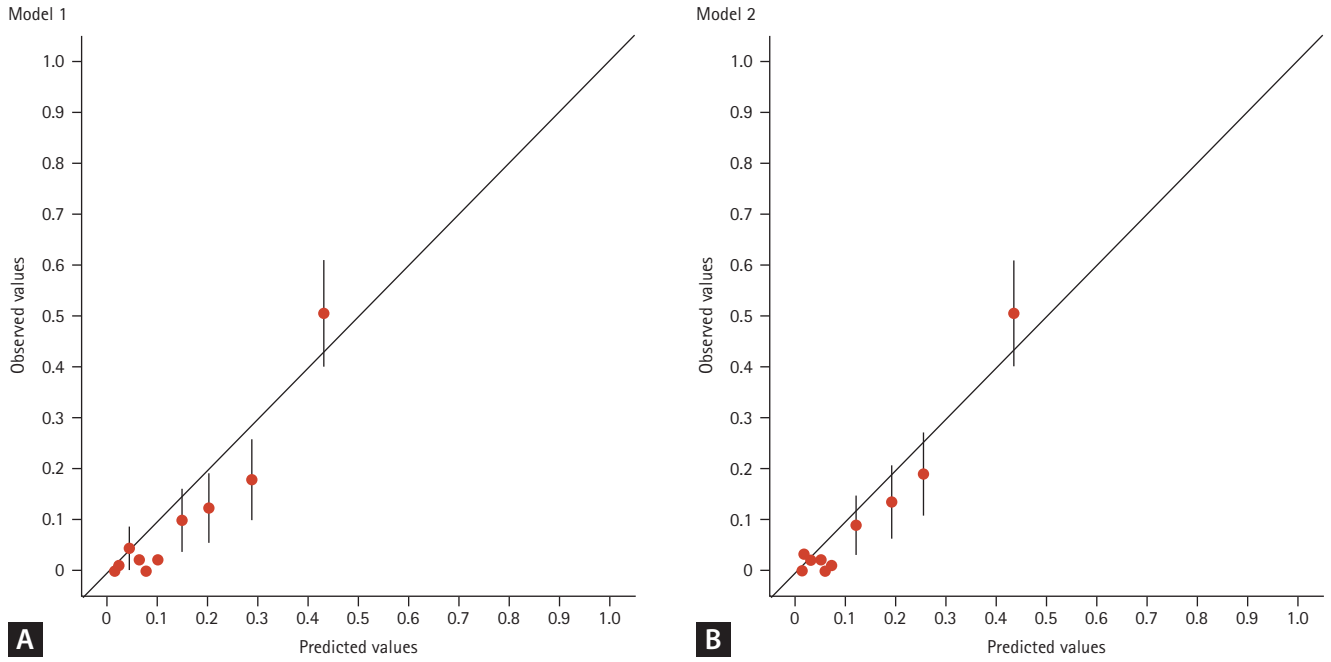

**Supplementary Figure 5.** Calibration plots for (A) model 1 and (B) model 2 for predicting ICU mortality (general hospital 1). ICU, intensive care unit.
